# Supplementary material
Source: PubMed Central journal article supplement (PMC4437208)
Supplement: NIHMS683351-supplement-supplement_1.pdf [file NIHMS683351-supplement-supplement_1.pdf]

## **SUPPLEMENTAL REFERENCES**

### **Polypharmacy and Cognitive Impairment:**

- Monastero R, Palmer K, Qiu C, Winblad B, Fratiglioni L. Heterogeneity in risk factors for cognitive impairment, no dementia: population-based longitudinal study from the Kungsholmen Project. *Am J Geriatr Psychiatry*. 2007;15:60-9. doi: 10.1097/01.JGP.0000229667.98607.34.

### **Polypharmacy and Falls:**

- Huang ES, Karter AJ, Danielson KK, Warton EM, Ahmed AT. The association between the number of prescription medications and incident falls in a multi-ethnic population of adult type-2 diabetes patients: the diabetes and aging study. *J Gen Intern Med*. 2010;25:141-6. Epub 2009 Dec 5. doi: 10.1007/s11606-009-1179-2.

### **Polypharmacy Definition:**

- Chan DC, Hao YT, Wu SC. Polypharmacy among disabled Taiwanese elderly: a longitudinal observational study. *Drugs Aging*. 2009;26:345-54. doi: 10.2165/00002512-200926040-00005.
- Haider SI, Johnell K, Weitoft GR, Thorslund M, Fastbom J. The influence of educational level on polypharmacy and inappropriate drug use: a register-based study of more than 600,000 older people. *J Am Geriatr Soc*. 2009;57:62-69. Epub 2008 Nov 14. doi: 10.1111/j.1532-5415.2008.02040.x.
- Flaherty JH, Perry HM 3<sup>rd</sup>, Lynchard GS, Morley JE. Polypharmacy and hospitalization among older home care patients. *J Gerontol A Biol Sci Med Sci*. 2000;55:M554-9. doi: 10.1093/gerona/55.10.M554.

### **Collinearity:**

- Zack M, Singleton J, Satterwhite C, Wall K, Delaney K. Collinearity diagnostics using the information matrix macro [SAS], Unpublished. Atlanta: Dept. of Epidemiology RSPH at Emory University; 2010, (contact [dkleinb@emory.edu](mailto:dkleinb@emory.edu)).

**Racial Differences in Medication Use:**

- Hanlon JT, Wang X, Good CB, *et al.* Racial differences in medication use among older long-stay Veterans Affairs nursing home care unit patients. *Consult Pharm.* 2009;24:439-46. doi: 10.4140/TCP.n.2009.050.

**Global Medication Use Geographic Variation Research:**

- Wangia V, Shireman TI. A review of geographic variation and Geographic Information Systems (GIS) applications in prescription drug use research. *Res Social Adm Pharm.* 2013;1-22. doi: 10.1016/j.sapharm.2012.11.006.

**Polypharmacy by Region (Abroad):**

- Hogan DB, Maxwell CJ, Fung TS, Eibly EM. Regional variation in the use of medications by older Canadians--a persistent and incompletely understood phenomena. *Pharmacoepidemiol Drug Saf.* 2003;12:575-82. Epub 2003 Jan 3. doi: 10.1002/pds.803.
- Nobili A, Franchi C, Pasina L, *et al.* Drug utilization and polypharmacy in an Italian elderly population: the EPIFARM-elderly Project. *Pharmacoepidemiol Drug Saf.* 2011;20:488-96. Epub 2011 Jan 24. doi: 10.1002/pds.2108.
- Franchi C, Cartabia M, Risso P, *et al.* Geographical differences in the prevalence of chronic polypharmacy in older people: eleven years of the EPIFARM-Elderly Project. *Eur J Clin Pharmacol.* 2013;69:1477-83. Epub 2013 Mar 28. doi: 10.1007/s00228-013-1495-7.

- Hovstadius B, Astrand B, Petersson G. Assessment of regional variation in polypharmacy. *Pharmacoepidemiol Drug Saf.* 2010;19:375-83. Epub 2010 Feb 26. doi: 10.1002/pds.1921.
- Chen YF, Dewey ME, Avery AJ; Analysis Group of the MRCCFA Study. Self-reported medication use for older people in England and Wales. *J Clin Pharm Ther.* 2001;26:129-40. Epub 2001 Dec 21. doi: 10.1046/j.1365-2710.2001.00333.x.
- Gokce Kutsal Y, Barak A, Atalay A, *et al.* Polypharmacy in the elderly: a multicenter study. *J Am Med Dir Assoc.* 2009;10:486-90. Epub 2009 Jun 28. doi: 10.1016/j.jamda.2009.03.018.

#### **Urban/Rural Variation in Medication Use:**

- Grymonpre RE, Hawranik PG. Rural residence and prescription medication use by community-dwelling older adults: a review of the literature. *J Rural Health.* 2008;24:203-9. Epub 2008 Apr 4. doi: 10.1111/j.1748-0361.2008.00159.x.
- Xu KT, Smith SR, Borders TF. Access to prescription drugs among noninstitutionalized elderly people in west Texas. *Am J Health Syst Pharm.* 2003;60:675-82.
- Hanlon JT, Landerman LR, Wall WE Jr, *et al.* Is medication use by community-dwelling elderly people influenced by cognitive function? *Age Ageing.* 1996;25:190-6.
- Lago D, Stuart B, Ahern F. Rurality and prescription drug utilization among the elderly: an archival study. *J Rural Health.* 1993;9:6-16. Epub 2008 Apr 8. doi: 10.1111/j.1748-0361.1993.tb00490.x.

#### **Spatial Distributions of the Use of Specific Medication Classes:**

- King M, Essick C. The geography of antidepressant, antipsychotic, and stimulant utilization in the United States. *Health & Place*. 2013;20:32-8. Epub 2013 Jan 7. doi: 10.1016/j.healthplace.2012.11.007.
- Zhang Y, Steinman MA, Kaplan CM. Geographic variation in outpatient antibiotic prescribing among older adults. *Arch Intern Med*. 2012;172:1465-71. Epub 2012 Sept 24. doi: 10.1001/archinternmed.2012.3717.
- Dubois RW, Batchlor E, Wade S. Geographic variation in the use of medications: is uniformity good news or bad? *Health Affairs*. 2002;21:240-50. doi: 10.1377/hlthaff.21.1.240.

**General Healthcare Regional Variation:**

- Fisher ES, Bynum JP, Skinner JS. Slowing the growth of health care costs--lessons from regional variation. *N Engl J Med*. 2009;360:849-52. doi: 10.1056/NEJMp0809794.

**Geographic Differences in Prescribing Quality:**

- Zhang Y, Baicker K, Newhouse JP. Geographic variation in the quality of prescribing. *N Engl J Med*. 2010;363:1985-8. Epub 2010 Nov 3. doi: 10.1056/NEJMp1010220.
